# Supplementary material for: High-Resolution UAV Imagery for Field Olive (Olea europaea L.) Phenotyping
Source: MDPI journal article supplement (doi:10.3390/horticulturae7080258), 2021-08-21
Supplement: s1 [file s1]

# Supplementary Materials: High-Resolution UAV Imagery for Field Olive (*Olea europaea* L.) Phenotyping

Giovanni Caruso, Giacomo Palai, Francesco Paolo Marra and Tiziano Caruso

**Table S1.** Canonical details calculated from the overall pooled within-group covariance matrix referred to discriminant analysis reported on Figure 7 and carried out using different vegetation indices (NDVI, MSAVI, GRNDVI, GNDVI, RVI, GRVI) to separate eight olive tree cultivars (Cerasuola, N. Belice, Biancolilla, N. Etnea, Minuta, Calatina, Abunara, Koroneiki) trained on a hedgerow system and three different planting distances (4 × 2 m, 4 × 3 m, and 4 × 4 m).

| Eigenvalue | Percent | Cum Percent | Canonical Corr | Likelihood Ratio | Approx. F | NumDF | DenDF  | Prob>F  |
|------------|---------|-------------|----------------|------------------|-----------|-------|--------|---------|
| 4.112      | 81.799  | 81.799      | 0.897          | 0.091            | 16.919    | 42    | 1068.2 | <.0001* |
| 0.568      | 11.306  | 93.105      | 0.603          | 0.467            | 6.378     | 30    | 914    | <.0001* |
| 0.287      | 5.700   | 98.806      | 0.472          | 0.733            | 3.730     | 20    | 760.46 | <.0001* |
| 0.058      | 1.154   | 99.960      | 0.234          | 0.943            | 1.132     | 12    | 608.81 | 0.330   |
| 0.002      | 0.040   | 100.000     | 0.044          | 0.998            | 0.077     | 6     | 462    | 0.998   |

| Test             | Value  | Approx. F | NumDF | DenDF  | Prob>F  |
|------------------|--------|-----------|-------|--------|---------|
| Wilks' Lambda    | 0.0914 | 16.919    | 42    | 1068.2 | <.0001* |
| Pillai's Trace   | 1.446  | 10.527    | 42    | 1392   | <.0001* |
| Hotelling-Lawley | 5.027  | 27.007    | 42    | 698.27 | <.0001* |
| Roy's Max Root   | 4.112  | 136.282   | 7     | 232    | <.0001* |

**Table S2.** Projected canopy area and canopy volume of olive trees of different cultivars planted at 4 × 2, 4 × 3 and 4 × 4 m measured on 27 February 2019. Values are means ± standard error of 10 trees per each cultivar-planting distance combination.

| Cultivar    | Planting distance | Projected canopy area (m <sup>2</sup> ) | Canopy volume (m <sup>3</sup> ) |
|-------------|-------------------|-----------------------------------------|---------------------------------|
| Cerasuola   | 4 × 2             | 3.42 ± 0.12                             | 6.32 ± 0.33                     |
| Cerasuola   | 4 × 3             | 4.73 ± 0.12                             | 7.82 ± 0.39                     |
| Cerasuola   | 4 × 4             | 4.71 ± 0.28                             | 8.05 ± 0.58                     |
| N. Belice   | 4 × 2             | 3.18 ± 0.17                             | 5.43 ± 0.49                     |
| N. Belice   | 4 × 3             | 4.53 ± 0.20                             | 7.20 ± 0.41                     |
| N. Belice   | 4 × 4             | 5.03 ± 0.33                             | 8.40 ± 0.56                     |
| Biancolilla | 4 × 2             | 3.30 ± 0.10                             | 5.65 ± 0.31                     |
| Biancolilla | 4 × 3             | 4.36 ± 0.21                             | 7.41 ± 0.39                     |
| Biancolilla | 4 × 4             | 4.55 ± 0.24                             | 7.29 ± 0.41                     |
| Etnea       | 4 × 2             | 3.22 ± 0.11                             | 5.64 ± 0.36                     |
| Etnea       | 4 × 3             | 4.52 ± 0.23                             | 7.37 ± 0.35                     |
| Etnea       | 4 × 4             | 4.61 ± 0.24                             | 7.08 ± 0.42                     |
| Minuta      | 4 × 2             | 3.48 ± 0.15                             | 6.18 ± 0.39                     |
| Minuta      | 4 × 3             | 4.45 ± 0.12                             | 7.12 ± 0.20                     |
| Minuta      | 4 × 4             | 4.48 ± 0.40                             | 8.92 ± 0.89                     |
| Calatina    | 4 × 2             | 3.19 ± 0.12                             | 5.36 ± 0.15                     |
| Calatina    | 4 × 3             | 3.40 ± 0.11                             | 5.36 ± 0.22                     |
| Calatina    | 4 × 4             | 3.28 ± 0.10                             | 5.07 ± 0.31                     |
| Abunara     | 4 × 2             | 3.57 ± 0.13                             | 6.49 ± 0.41                     |
| Abunara     | 4 × 3             | 3.87 ± 0.26                             | 6.31 ± 0.57                     |
| Abunara     | 4 × 4             | 5.36 ± 0.22                             | 7.95 ± 0.35                     |
| Koroneiki   | 4 × 2             | 3.47 ± 0.12                             | 6.31 ± 0.35                     |
| Koroneiki   | 4 × 3             | 4.50 ± 0.20                             | 7.04 ± 0.42                     |
| Koroneiki   | 4 × 4             | 4.51 ± 0.33                             | 7.22 ± 0.83                     |
